# Supplementary material for: Detection of posttraumatic pneumothorax using electrical impedance tomography—An observer-blinded study in pigs with blunt chest trauma
Source: PLoS One. 2020 Jan 10;15(1):e0227518. doi: 10.1371/journal.pone.0227518 (PMC6953828; doi:10.1371/journal.pone.0227518)
Supplement: S1 Table — EIT: Electrical Impedance Tomography; PTX: pneumothorax. (XLSX) [file pone.0227518.s001.xlsx]

## Sheet: Main data
Anonymization Number EIT file	Animal Number	PTX visible in CT yes=1, no=0	Relevant PTX visible in CT yes=1, no=0	PTXtrans20 in CT yes=1, no=0	PTXtrans20 location (segment)	PTXcc3 visible in CT yes=1, no=0	PTXcc3 location (segment)	PTXtranscc visible in CT yes=1, no=0	PTXtranscc location (segment)	PTX visualized by detection algorithm yes=1, no=0	PTX vizualized by deterction algorithm - location	Observer 1 PTX detected yes=1, no=0	Observer 1 PTX location (segment)	Observer 1 spikes detected yes=1, no=0	Observer2 PTX detected yes=1, no=0	Observer 2 PTX location (segment)	Observer 2 spikes detected yes=1, no=0	Max Area of PTX in CT (mm2)	Max diameter of PTX in CT	Number of detected PTX in CT (total count)	Vertebrosternal distance measured in CT	Diameter of PTX divided by vertobrosternal distance
0b7081	20	1	1	1	6	1	3	0		1	3	0		0	0		0	1054	24	7	114	0.210526
0d023b	11	0	0	0		0		0		0		0		0	0		0			0	105	0
1a090d	7	1	1	1	5	1	5	1	5	1	5	0		0	0		0	1620	20	1	100	0.2
1ca16a	7	1	1	0		1	2	0		1	3	1	7	0	0		0	460	10	1	109	0.0917431
02dfea	40	1	0	0		0		0		0		1	2	0	1	2	0	28	6	2	106	0.0566038
2c5c3a	7	1	1	1	6	1	2	0		1	2	1	2	0	0		0	2560	35	1	112	0.3125
2ea985	24	1	1	1	6	1	5	0		1	3	1	8	0	0		0	4240	102	1	101	1.0099
3ccd3e	7	0	0	0		0		0		0		0		0	0		0			0	110	0
3e639c	19	1	0	0		0		0		1	3	0		0	0		0	160	6	1	104	0.0576923
3e7439	21	1	1	0		1	5	0		1	5	1	2	0	0		0	2471	24	3	123	0.195122
3ef874	19	0	0	0		0		0		1	3	0		0	0		0			0	101	0
4fc46b	14	1	1	1	6	0		0		0		1	3	0	0		0	2040	55	1	111	0.495495
4fd1bc	19	1	0	0		0		0		1	5	0		0	0		0	110	8	1	100	0.08
5c29f4	13	1	0	0		0		0		0		0		0	0		0	10	7	1	110	0.0636364
5c337f	13	1	1	0		1	3	0		0		0		0	0		0	170	9	1	110	0.0818182
5ddc06	19	1	1	0		1	2	0		1	5	0		0	0		0	340	11	2	102	0.107843
6b2f9b	20	1	1	1	6	1	3	0		0	0	0		0	0		0	1733	55	3	113	0.486726
6d49b7	19	1	1	0		1	2	0		1	2	0		0	0		0	90	8	1	99	0.0808081
6e6e18	21	1	1	1	6	1	2	0		1	2	1	6	1	1	2	1	1550	51	2	120	0.425
6eecdd	22	1	1	1	6	1	10	0		0		0		0	0		0	5010	88	3	118	0.745763
7cf5b	13	1	1	0		1	3	0		0		0		0	0		0	170	7	3	110	0.0636364
7c7da1	20	1	0	0		0		0		0		0		0	0		0	930	19	3	112	0.169643
7e500f	11	1	1	1	6	0		0		1	1	0		0	0		0	2670	64	1	106	0.603774
7f3bc2	19	1	1	0		1	2	0		1	5	0		0	0		0	310	10	2	100	0.1
8a5f2e	19	1	1	0		1	2	0		1	5	0		0	0		0	200	9	1	104	0.0865385
8a625e	21	0	0	0		0		0		0		0		0	0		0			0	120	0
9f0974	16	1	1	1	6	1	5	0		1	5	1	6	1	1	2	1	2180	58	2	104	0.557692
25ae5a	20	1	1	0		0		0		0	0	1	3	0	0		0	90	11	4	117	0.0940171
30ad04	13	1	1	0		1	2	0		1	3	1	3	1	0		0	230	12	2	111	0.108108
32fced	20	1	1	1	6	1	5	0		1	3	0		0	0		0	1510	60	5	117	0.512821
39f6d6	22	1	1	1	10	0		0		0		1	3	1	0		0	310	24	3	117	0.205128
41e565	14	0	0	0		0		0		0		0		1	0		0			0	111	0
49cb88	19	1	1	0		1	2	0		1	3	0		0	0		0	250	7	1	100	0.07
50b7ca	21	1	1	1	6	0		0		0		1	3	0	0		0	680	36	3	119	0.302521
57bf89	20	1	1	1	6	1	5	0		0		0		0	0		0	1200	50	2	116	0.431034
060bf3	8	1	1	0		1	2	0		0		1	5	1	0		0	480	22	1	118	0.186441
67cfda	8	1	1	0		1	5	0		1	3	1	5	1	0		0	980	12	4	121	0.0991736
68d35e	7	1	1	1	7	1	7	1	7	1	7	1	5	1	0		0	3390	38	1	109	0.348624
73ad9a	21	1	1	1	3	1	1	0		1	3	1	3	1	0		0	380	32	3	121	0.264463
76e25a	14	1	1	1	6	0		0		0		0		0	0		0	1260	63	1	111	0.567568
78aa2d	8	1	1	0		1	2	0		1	3	1	5	1	0		0	720	13	3	117	0.111111
79cda7	21	1	1	0		1	5	0		0		0		1	0		0	570	8	3	119	0.0672269
81a0c0	22	0	0	0		0		0		0		1	5	1	0		0			0	116	0
82eedc	40	1	1	0		1	5	0		1	3	1	5	1	0		0	910	12	3	104	0.115385
83b00d	13	1	0	0		0		0		0		0		1	0		0	150	9	2	109	0.0825688
85c8cc	14	1	1	1	6	0		0		0		1	3	1	0		0	1940	65	1	112	0.580357
88c4ef	9	1	1	1	3	1	3	1	3	1	3	1	3	1	0		0	920	64	1	127	0.503937
91d52a	7	1	1	1	6	1	7	0		1	2	1	3	1	0		0	2780	23	2	110	0.209091
92f4c9	22	1	1	1	6	0		0		1	3	1	5	1	0		0	690	48	4	115	0.417391
96e314	14	1	1	1	6	0		0		0		0		1	0		0	2350	69	1	112	0.616071
403f50	7	1	1	0		1	5	0		1	3	1	3	1	0		0	830	15	1	108	0.138889
637c3c	15	1	1	0		1	2	0		1	3	0		0	0		0	170	9	6	116	0.0775862
691afc	14	1	1	1	6	0		0		0		1	3	0	0		0	3330	277	1	108	2.56481
0701f0	14	1	1	1	6	0		0		0		0		0	0		0	2710	274	1	110	2.49091
777b34	7	1	1	0		1	2	0		1	3	1	3	1	0		0	740	14	1	109	0.12844
788cd0	18	1	0	0		0		0		0		0		1	0		0	100	8	1	112	0.0714286
839d68	24	1	1	1	6	1	5	0		1	3	1	3	1	0		0	1980	94	2	103	0.912621
935ea0	9	0	0	0		0		0		1	3	1	3	1	0		0			0	124	0
952aa5	22	1	1	1	6	0		0		0		1	5	1	0		0	5750	92	3	117	0.786325
969bd1	20	1	1	1	6	1	8	0		0		1	5	1	0		0	2930	80	2	113	0.707965
4940d6	40	1	0	0		0		0		1	2	0		0	0		0	130	11	2	107	0.102804
6566d5	20	0	0	0		0		0		1	5	0		0	0		0			0	113	0
6959af	18	0	0	0		0		0		0		1	3	1	0		0			0	109	0
9743ac	22	1	1	1	7	1	7	1	7	1	7	1	3	1	0		0	2150	59	2	121	0.487603
23030f	10	0	0	0		0		0		0		0		0	0		0			0	99	0
46688f	8	0	0	0		0		0		0		1	3	1	0		0			0	122	0
47452a	21	1	0	0		0		0		1	3	1	3	1	0		0	290	23	3	121	0.190083
61274a	13	1	0	1	3	0		0		0		1	3	1	1	5	1	1380	28	4	112	0.25
70258e	13	0	0	0		0		0		0		0		0	0		0			0	111	0
97422b	7	1	1	0		1	5	0		0		1	8	1	0		0	930	12	1	108	0.111111
339510	17	1	0	0		0		0		1	2	1	5	1	0		0	50	4	2	111	0.036036
405489	14	1	1	1	6	0		0		0		1	3	1	0		0	2850	76	2	111	0.684685
832597	17	1	0	0		0		0		0		1	5	1	0		0	90	5	2	112	0.0446429
a9f140	22	1	1	1	6	0		0		0		1	3	1	0		0	5060	90	2	118	0.762712
a81b53	16	1	1	0		1	2	0		1	7	1	5	1	0		0	160	4	3	100	0.04
a88d2f	21	1	1	1	6	1	7	0		0		1	5	1	0		0	1700	56	2	119	0.470588
aa204f	20	1	1	1	6	1	8	0		0		1	3	1	0		0	1730	58	1	114	0.508772
ad1244	8	1	1	0		1	5	0		1	3	1	5	1	1	5	1	720	14	3	121	0.115702			RAN00_P10
adfdb9	19	1	0	0		0		0		1	2	0		0	0		0	30	5	1	100	0.05
b2e044	40	1	1	0		1	3	0		0		0		0	1	5	0	420	17	3	105	0.161905
b31388	8	1	1	0		1	7	0		1	7	1	3	1	1	5	1	600	13	3	121	0.107438			Ven08_P8
ba82f9	8	1	1	0		1	5	0		1	3	1	3	1	1	5	0	610	12	3	123	0.097561			Ven04_P8
bc60bc	40	1	0	0		0		0		1	2	0		0	0		0	70	4	3	109	0.0366972
c1ad24	20	1	1	1	6	1	5	0		1	3	0		0	0		0	600	48	3	116	0.413793
c351a3	21	1	1	1	6	0		0		0		0		0	1	2	0	1320	51	3	120	0.425
ceaf6e	13	1	0	0		0		0		0		1	3	1	0		1	120	10	2	111	0.0900901
dc3739	8	1	1	0		1	5	0		1	3	1	6	1	1	3	1	680	13	4	122	0.106557			Ven00_P10
e1da72	15	1	1	0		1	2	0		1	3	0		0	0		1	210	10	4	115	0.0869565
e3b597	11	1	1	1	6	1	2	0		1	2	0		0	0		0	3420	72	2	107	0.672897
e3b670	7	1	1	0		1	5	0		0		1	3	1	0		1	1580	20	1	109	0.183486
e4d149	18	1	1	0		1	2	0		0		1	5	1	0		0	2880	15	2	112	0.133929
e29f88	20	1	1	1	6	1	3	0		1	3	0		0	0		0	940	49	3	117	0.418803
e16055	22	1	1	1	6	0		0		0		0		1	1	5	1	5110	87	1	118	0.737288
eeca7c	21	1	1	1	1	1	5	0		0		1	5	1	1	6	1	3370	38	2	123	0.308943
f1b555	8	1	1	1	6	1	2	0		1	3	0		0	1	5	1	2040	61	3	118	0.516949
f9e67e	9	1	0	0		0		0		1	3	1	3	1	1	3	1	120	5	1	128	0.0390625
f846f8	14	1	1	1	6	0		0		0		0		0	0		0	2230	70	1	113	0.619469
fd5302	24	0	0	0		0		0		1	3	1	3	1	0		0			0	99	0
fe1713	14	1	1	1	6	0		0		0		1	3	0	0		0	2290	74	1	111	0.666667
ff765a	8	1	1	0		1	3	0		1	7	1	5	1	0		0	310	13	3	106	0.122642
